# Supplementary material for: Mode of action of the 2-phenylquinoline efflux inhibitor PQQ4R against Escherichia coli
Source: PeerJ. 2017 Apr 26;5:e3168. doi: 10.7717/peerj.3168 (PMC5433425; doi:10.7717/peerj.3168)
Supplement: Data S1 [file peerj-05-3168-s002.xlsx]

## Sheet: CFU
		CFU count - Strain dilution													CFU count - absolute values													Mean	Log10
Concentration	Collection time	10^0	10^-1	10^-2	10^-3	10^-4	10^-5	10^-6	10^-7	10^-8	10^-9	10^-10	10^-11	10^-12	10^0	10^-1	10^-2	10^-3	10^-4	10^-5	10^-6	10^-7	10^-8	10^-9	10^-10	10^-11	10^-12
E. coli AG100 control	T0	345													17250													17250	4.23679
	T1		75	11	0											37500	55000	0										30833.3	4.48902
	T2		267	48	4											133500	240000	200000										191167	5.28141
	T3			362	84	15											1810000	4200000	7500000									4.50333e+06	6.65353
	T4				299	55	5											14950000	27500000	25000000								2.24833e+07	7.35186
	T5				Unc.	382	86											Unc.	191000000	430000000								310500000	8.49206
	T6				Unc.	1632	902											Unc.	816000000	4510000000								2663000000	9.42537
	T24				Unc.	Unc.	Unc.	Unc.	Unc		220	187	112					Unc.	Unc.	Unc.	Unc.			11000000000000	93500000000000	560000000000000		221500000000000	14.3454
	T0	345													17250													17250	4.23679
PQQ 4R 1/2 MIC	T1	91	22	1											4550	11000	5000											6850	3.83569
	T2	62	4	1											3100	2000	5000											3366.67	3.5272
	T3	51	4	1											2550	2000	5000											3183.33	3.50288
	T4	29	3	1											1450	1500	5000											2650	3.42325
	T5	17	2	0											850	1000	0											616.667	2.79005
	T6	10	0	0											500	0	0											166.667	2.22185
	T24				Unc.	Unc.	97	46	41	36	21	11	10	2				Unc.	Unc.	485000000	2300000000	20500000000	180000000000	1050000000000	5500000000000	50000000000000	100000000000000	19594160625000	13.2921
	T0	345													17250													17250	4.23679
PQQ 4R MIC	T1	31	3	0											1550	1500	0											1016.67	3.00718
	T2	3	1	0											150	500	0											216.667	2.33579
	T3	1	0	0											50	0	0											16.6667	1.22185
	T4	0	0	0											0	0	0											0	0
	T5	0	0	0											0	0	0											0	0
	T6	0	0	0											0	0	0											0	0
	T24	0	0	0											0	0	0											0	0
	T0	345													17250													17250	4.23679
PQQ 4R 2xMIC	T1	0	0	0											0	0	0											0	0
	T2	0	0	0											0	0	0											0	0
	T3		0	0	0	0	0									0	0	0	0	0								0	0
	T4		0	0	0	0	0									0	0	0	0	0								0	0
	T5			0	0	0	0	0									0	0	0	0	0							0	0
	T6			0	0	0	0	0									0	0	0	0	0							0	0
	T24			0	0	0	0	0									0	0	0	0	0							0	0
	T0	345													17250													17250	4.23679
PQQ 4R 4xMIC	T1	0	0	0											0													0	0
	T2	0	0	0											0	0	0											0	0
	T3	0	0	0											0	0	0											0	0
	T4	0	0	0											0	0	0											0	0
	T5	0	0	0											0	0	0											0	0
	T6	0	0	0											0	0	0											0	0
	T24	0	0	0											0	0	0											0	0
	T0	345													17250													17250	4.23679
PQQ 4R 8xMIC	T1	0	0	0											0													0	0
	T2	0	0	0											0	0	0											0	0
	T3	0	0	0											0	0	0											0	0
	T4	0	0	0											0	0	0											0	0
	T5	0	0	0											0	0	0											0	0
	T6	0	0	0											0	0	0											0	0
	T24	0	0	0											0	0	0											0	0
