# Supplementary material for: Mode of action of the 2-phenylquinoline efflux inhibitor PQQ4R against Escherichia coli
Source: PeerJ. 2017 Apr 26;5:e3168. doi: 10.7717/peerj.3168 (PMC5433425; doi:10.7717/peerj.3168)
Supplement: Data S2 [file peerj-05-3168-s003.xlsx]

## Sheet: Plate 4 - Sheet1
Software Version	2.04.11
Experiment File Path:	C:\Documents and Settings\Administrator\My Documents\Diana\Toxicity_PAN, 4R.xpt
Protocol File Path:	C:\Documents and Settings\All Users\Documents\Protocols\AlamarBlue.prt
Plate Number	Plate 4
Date
Time
Reader Type:	Synergy HT
Reader Serial Number:	1312151
Reading Type	Reader
Procedure Details
Plate Type	Nunclon 96 flat bottom
Read	Fluorescence Endpoint
	Full Plate
	Filter Set 1
	Excitation: 530/25, Emission: 590/35
	Optics: Top, Gain: 35
	Read Speed: Normal
	Read Height: 5 mm
Set Temperature	Incubator off
Layout
		1	2	3	4	5	6	7	8	9	10	11	12
	A	SPL1	SPL2	SPL3	SPL4	SPL5	SPL6	SPL7	SPL8	SPL9	SPL10	SPL11	SPL12	Well ID
	B	SPL13	SPL1	SPL7	SPL13	SPL19	SPL25	SPL31	SPL37	SPL43	SPL49	SPL55	SPL32	Well ID
	C	SPL14	SPL2	SPL8	SPL14	SPL20	SPL26	SPL32	SPL38	SPL44	SPL50	SPL56	SPL33	Well ID
	D	SPL15	SPL3	SPL9	SPL15	SPL21	SPL27	SPL33	SPL39	SPL45	SPL51	SPL57	SPL34	Well ID
	E	SPL16	SPL4	SPL10	SPL16	SPL22	SPL28	SPL34	SPL40	SPL46	SPL52	SPL58	SPL35	Well ID
	F	SPL17	SPL5	SPL11	SPL17	SPL23	SPL29	SPL35	SPL41	SPL47	SPL53	SPL59	SPL36	Well ID
	G	SPL18	SPL6	SPL12	SPL18	SPL24	SPL30	SPL36	SPL42	SPL48	SPL54	SPL60	SPL37	Well ID
	H	SPL20	SPL21	SPL22	SPL23	SPL24	SPL25	SPL26	SPL27	SPL28	SPL29	SPL30	SPL31	Well ID
Results				uM
			Control	160	80	40	20	10	5	2.5	1.25	0.625
		1	2	3	4	5	6	7	8	9	10	11	12
	A
PQQ4R	B		4121	259	254	254	256	253	468	4399	4755	4943		530/25,590/35
	C		3749	263	250	251	246	248	451	4615	4559	4771		530/25,590/35
	D		4336	255	251	248	248	248	495	4267	4604	4650		530/25,590/35
PAN	E		4068	296	2305	3650	3356	3584	3781	4438	4321	5144		530/25,590/35
	F		4025	358	2619	3381	3644	4033	3772	4039	4369	4515		530/25,590/35
	G		4497	371	2474	3133	3382	3977	3994	4264	4263	5435		530/25,590/35
	H
			Control	2560	1280	640	320	160	80	40	20	10
				uM

## Sheet: Plate 3 - Sheet1
Software Version	2.04.11
Experiment File Path:	C:\Documents and Settings\Administrator\My Documents\Diana\Toxicity_CPZ.xpt
Protocol File Path:	C:\Documents and Settings\All Users\Documents\Protocols\AlamarBlue.prt
Plate Number	Plate 3
Date
Time
Reader Type:	Synergy HT
Reader Serial Number:	1312151
Reading Type	Reader
Procedure Details
Plate Type	Nunclon 96 flat bottom
Read	Fluorescence Endpoint
	Full Plate
	Filter Set 1
	Excitation: 530/25, Emission: 590/35
	Optics: Top, Gain: 35
	Read Speed: Normal
	Read Height: 5 mm
Set Temperature	Incubator off
Layout
		1	2	3	4	5	6	7	8	9	10	11	12
	A	SPL1	SPL2	SPL3	SPL4	SPL5	SPL6	SPL7	SPL8	SPL9	SPL10	SPL11	SPL12	Well ID
	B	SPL13	SPL1	SPL7	SPL13	SPL19	SPL25	SPL31	SPL37	SPL43	SPL49	SPL55	SPL32	Well ID
	C	SPL14	SPL2	SPL8	SPL14	SPL20	SPL26	SPL32	SPL38	SPL44	SPL50	SPL56	SPL33	Well ID
	D	SPL15	SPL3	SPL9	SPL15	SPL21	SPL27	SPL33	SPL39	SPL45	SPL51	SPL57	SPL34	Well ID
	E	SPL16	SPL4	SPL10	SPL16	SPL22	SPL28	SPL34	SPL40	SPL46	SPL52	SPL58	SPL35	Well ID
	F	SPL17	SPL5	SPL11	SPL17	SPL23	SPL29	SPL35	SPL41	SPL47	SPL53	SPL59	SPL36	Well ID
	G	SPL18	SPL6	SPL12	SPL18	SPL24	SPL30	SPL36	SPL42	SPL48	SPL54	SPL60	SPL37	Well ID
	H	SPL20	SPL21	SPL22	SPL23	SPL24	SPL25	SPL26	SPL27	SPL28	SPL29	SPL30	SPL31	Well ID
Results
		1	2	3	4	5	6	7	8	9	10	11	12
	A													530/25,590/35
	B													530/25,590/35
	C													530/25,590/35
	D													530/25,590/35
CPZ	E		3892	167	154	180	2289	3782	3409	3583	3702	3992		530/25,590/35
	F		3884	171	152	175	2814	3699	3338	3251	3810	3873		530/25,590/35
	G		4192	190	184	191	2382	3655	3735	3192	3835	3910		530/25,590/35
	H													530/25,590/35
			Control	160	80	40	20	10	5	2.5	1.25	0.625
				uM
