# Supplementary material for: Mode of action of the 2-phenylquinoline efflux inhibitor PQQ4R against Escherichia coli
Source: PeerJ. 2017 Apr 26;5:e3168. doi: 10.7717/peerj.3168 (PMC5433425; doi:10.7717/peerj.3168)
Supplement: Data S6 [file peerj-05-3168-s007.xlsx]

## Sheet: Plate 1 - Sheet1
Software Version	2.04.11
Experiment File Path:	C:\Documents and Settings\Administrator\My Documents\Diana\Pierce LDH\Pierce LDH_26jan17.xpt
Protocol File Path:	C:\Documents and Settings\All Users\Documents\Protocols\Pierce LDH.prt
Plate Number	Plate 1
Date	2016-06-03
Time	16:05:46
Reader Type:	Synergy HT
Reader Serial Number:	1312151
Reading Type	Reader
Procedure Details
Plate Type	Nunclon 96 flat bottom
Read	Absorbance Endpoint
	Full Plate
	Wavelengths: 490, 630
	Read Speed: Normal
Set Temperature	Incubator off
Results
												C
		1	2	3	4	5	6	7	8	9	10	11	12
	A													490
														630
	B													490
														630
	C													490
														630
	D													490
														630
4R	E		0.474	0.539	0.599	0.561	0.542	0.461	0.21	0.184	0.179	0.193		490
			0.162	0.169	0.164	0.16	0.138	0.121	0.092	0.09	0.088	0.089		630
	F		0.592	0.638	0.56	0.635	0.63	0.417	0.2	0.186	0.177	0.207		490
			0.158	0.177	0.148	0.144	0.141	0.119	0.092	0.09	0.088	0.097		630
	G		0.523	0.556	0.565	0.519	0.567	0.43	0.239	0.218	0.173	0.202		490
			0.152	0.152	0.144	0.145	0.133	0.116	0.094	0.093	0.089	0.09		630
	H													490
														630
			160	80	40	20	10	5	2.5	1.25	0.625	C

## Sheet: Plate 2 - Sheet1
Software Version	2.04.11
Experiment File Path:	C:\Documents and Settings\Administrator\My Documents\Diana\Pierce LDH\Pierce LDH_26jan17.xpt
Protocol File Path:	C:\Documents and Settings\All Users\Documents\Protocols\Pierce LDH.prt
Plate Number	Plate 2
Date	2016-06-03
Time	16:22:45
Reader Type:	Synergy HT
Reader Serial Number:	1312151
Reading Type	Reader
Procedure Details
Plate Type	Nunclon 96 flat bottom
Read	Absorbance Endpoint
	Full Plate
	Wavelengths: 490, 630
	Read Speed: Normal
Set Temperature	Incubator off
Results
			2560	1280	640	320	160	80	40	20	10	C
		1	2	3	4	5	6	7	8	9	10	11	12
	A													490
														630
PAN	B		0.612	0.434	0.201	0.226	0.25	0.221	0.213	0.185	0.218	0.206		490
			0.334	0.175	0.096	0.099	0.098	0.11	0.106	0.094	0.102	0.091		630
	C		0.538	0.517	0.208	0.222	0.23	0.196	0.202	0.182	0.187	0.205		490
			0.228	0.213	0.11	0.109	0.096	0.102	0.115	0.098	0.108	0.105		630
	D		0.513	0.508	0.215	0.196	0.207	0.201	0.198	0.182	0.203	0.217		490
			0.206	0.218	0.112	0.1	0.105	0.112	0.108	0.113	0.118	0.108		630
CPZ	E		0.684	0.716	0.611	0.352	0.243	0.239	0.21	0.207	0.216	0.225		490
			0.175	0.204	0.161	0.131	0.111	0.119	0.103	0.108	0.124	0.118		630
	F		0.608	0.662	0.622	0.294	0.238	0.245	0.247	0.191	0.194	0.263		490
			0.158	0.17	0.169	0.117	0.11	0.107	0.109	0.098	0.105	0.111		630
	G		0.69	0.588	0.674	0.277	0.22	0.218	0.214	0.208	0.188	0.219		490
			0.149	0.163	0.182	0.103	0.103	0.1	0.094	0.1	0.093	0.094		630
			160	80	40	20	10	5	2.5	1.25	0.625	C
control	H		0.203	0.203	0.204	0.649	0.693	0.654	2.235	2.262	2.207			490
			0.092	0.094	0.093	0.136	0.134	0.138	0.409	0.416	0.401			630
			water treat	water treat	water treat	max LDH release	max LDH release	max LDH release	LDH control+	LDH control+	LDH control+
